# Supplementary material for: Analysis of volatile short-chain fatty acids in the gas phase using secondary electrospray ionization coupled to mass spectrometry
Source: Royal Society of Chemistry journal article supplement (doi:10.1039/d2ay01778d), 2022-12-23
Supplement: d2ay01778d1.pdf [file d2ay01778d1.pdf]

***Analysis of volatile short-chain fatty acids in the gas phase using  
secondary electrospray ionization coupled with high-resolution  
mass spectrometry***

Cedric Wüthrich<sup>1</sup>, Zhiyuan Fan<sup>1</sup>, Guy Vergères<sup>2</sup>, Fabian Wahl<sup>2</sup>, Renato Zenobi<sup>1,\*</sup>, Stamatios  
Giannoukos<sup>1,\*</sup>

(1) Department of Chemistry and Applied Biosciences, ETHZ, Zurich, Switzerland

(2) Food Microbial Systems Research Division, Agroscope, Bern, Switzerland

\*Correspondance: Stamatios Giannoukos ([stamatios.giannoukos@org.chem.ethz.ch](mailto:stamatios.giannoukos@org.chem.ethz.ch)), Renato  
Zenobi ([renato.zenobi@org.chem.ethz.ch](mailto:renato.zenobi@org.chem.ethz.ch))

**Short Title:** Analysis of SCFA using SESI-HRMS.

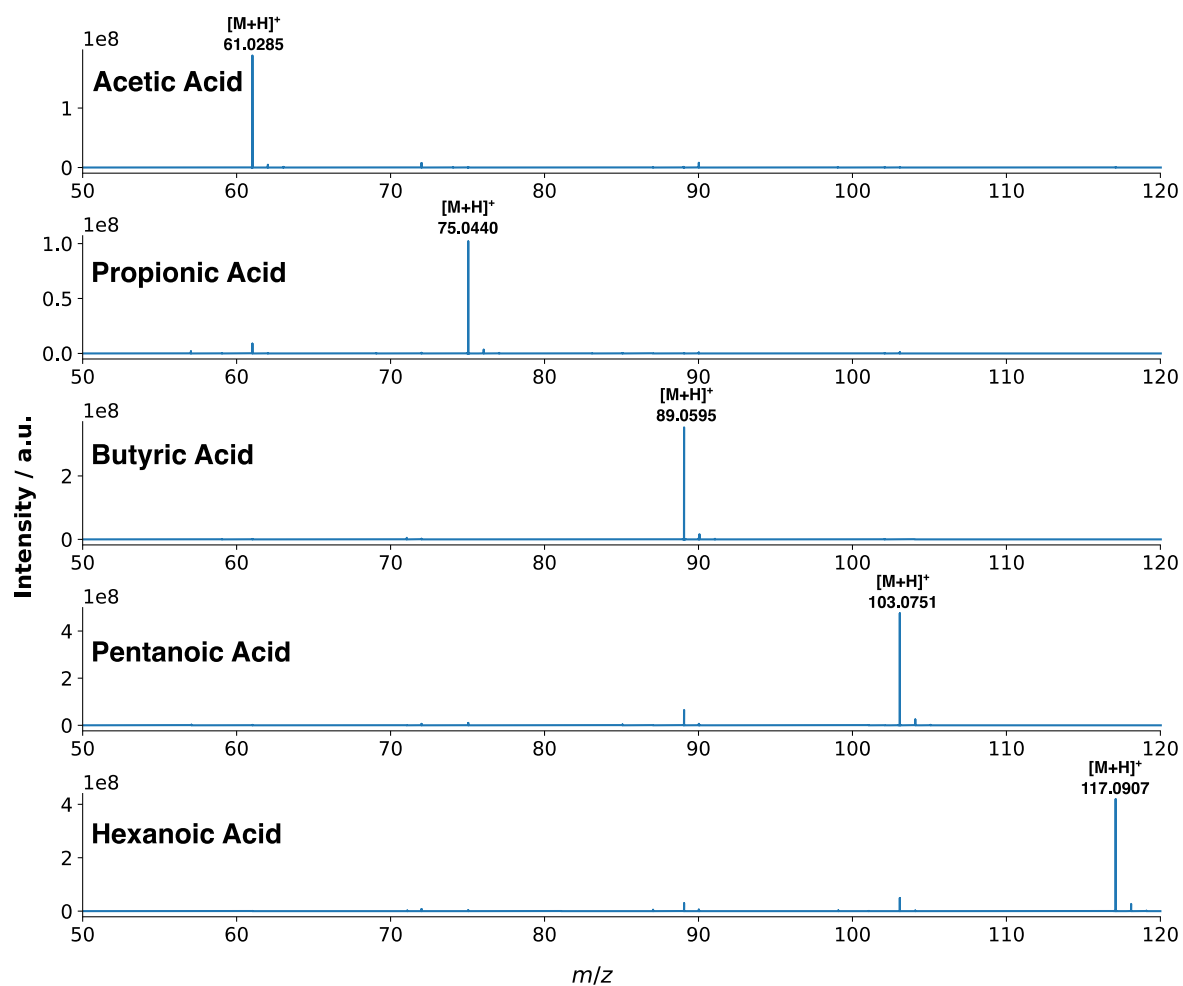

**Figure S1.** Experimental mass spectra for acetic, propionic, butyric, pentanoic and hexanoic acid obtained with the SESI-HR-MS system

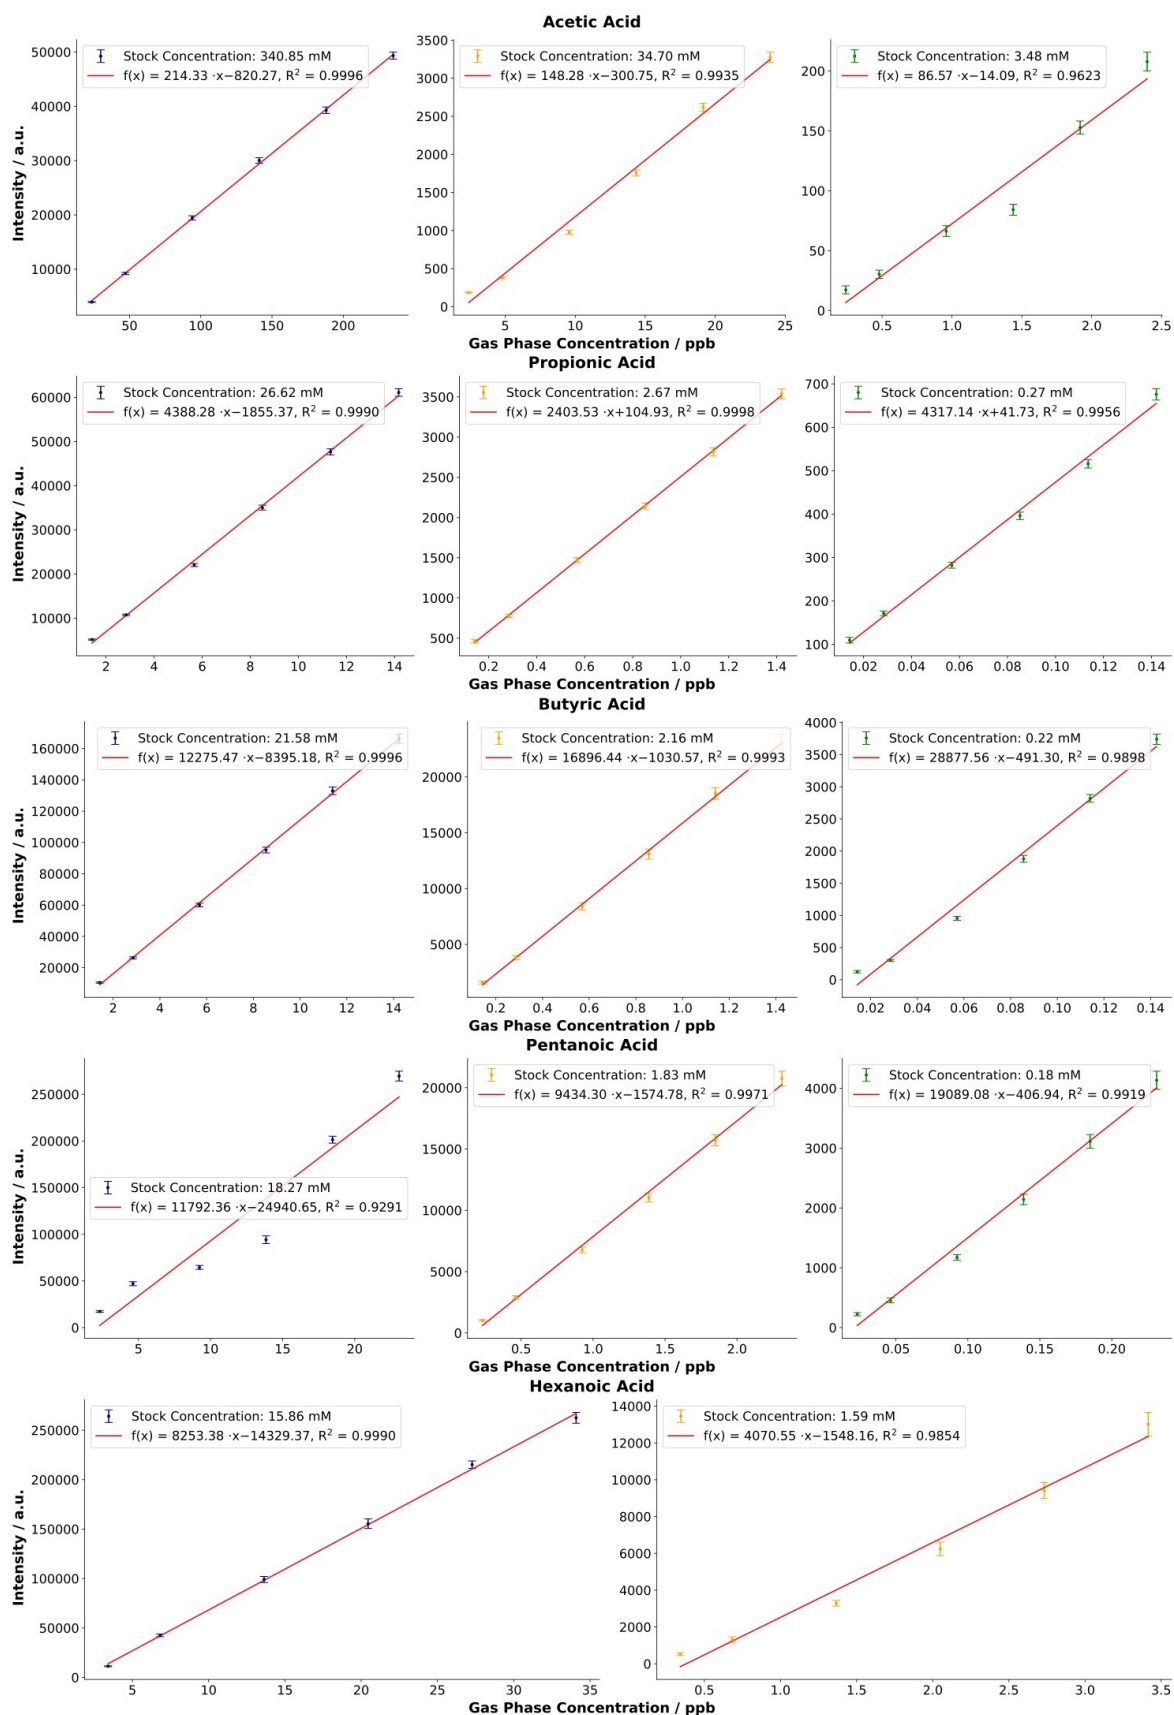

**Figure S2.** Calibration curves of the individual stock solutions under 0 % RH.

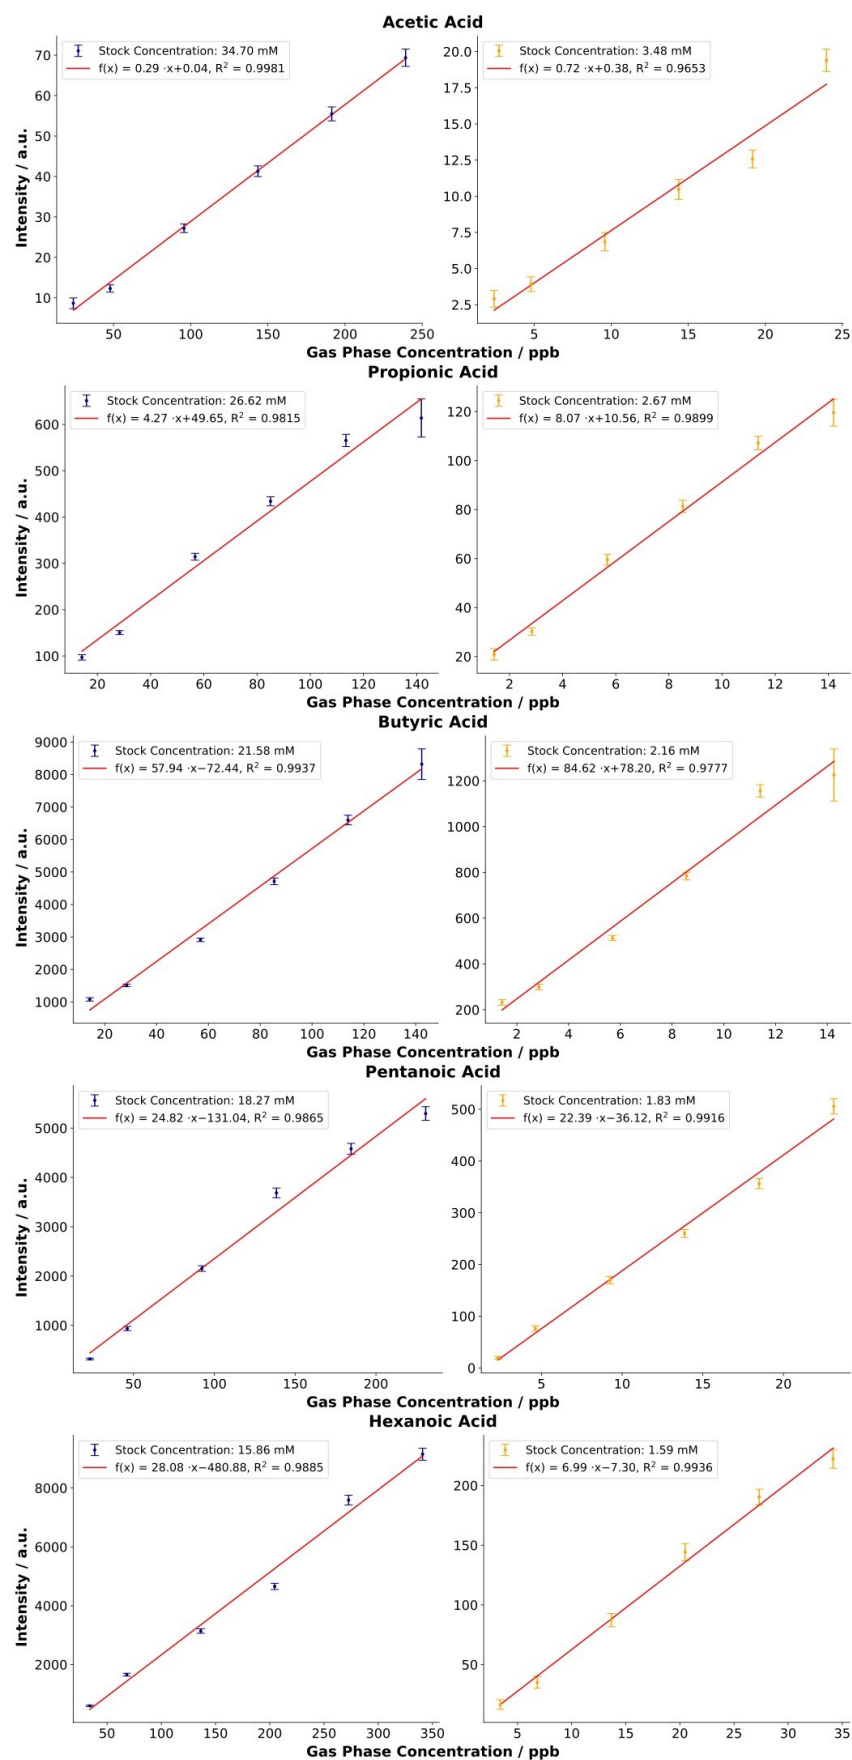

**Figure S3.** Calibration curves of the individual stock solutions under 95 % RH.

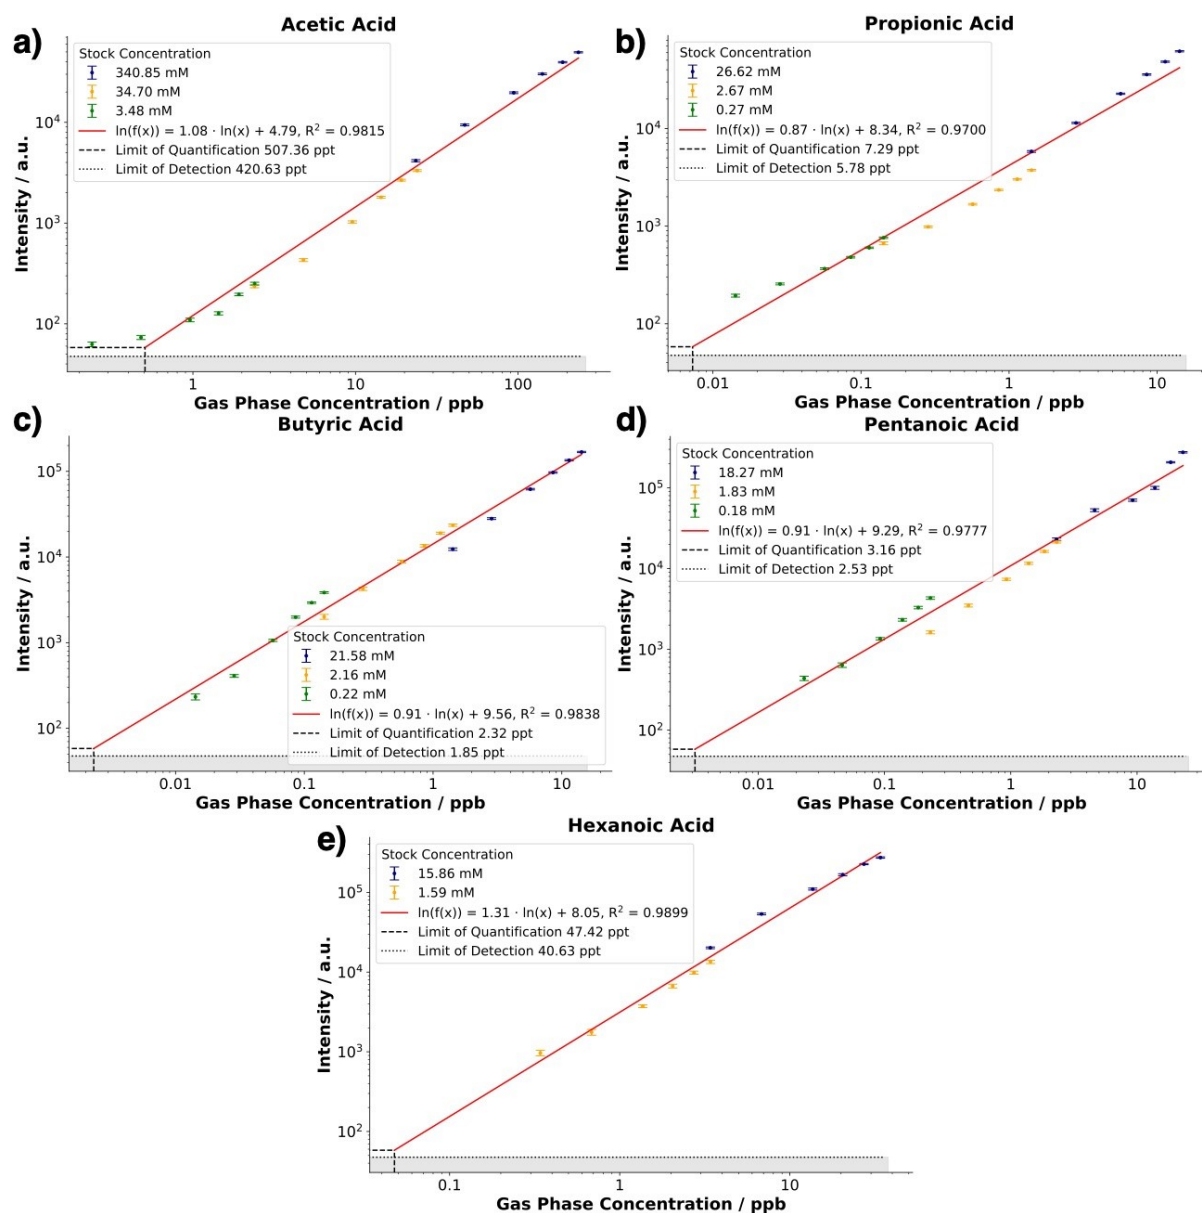

**Figure S4.** Calibration curves for the dry conditions with the individual limits of detection and limits of quantification for each SCFA tested.

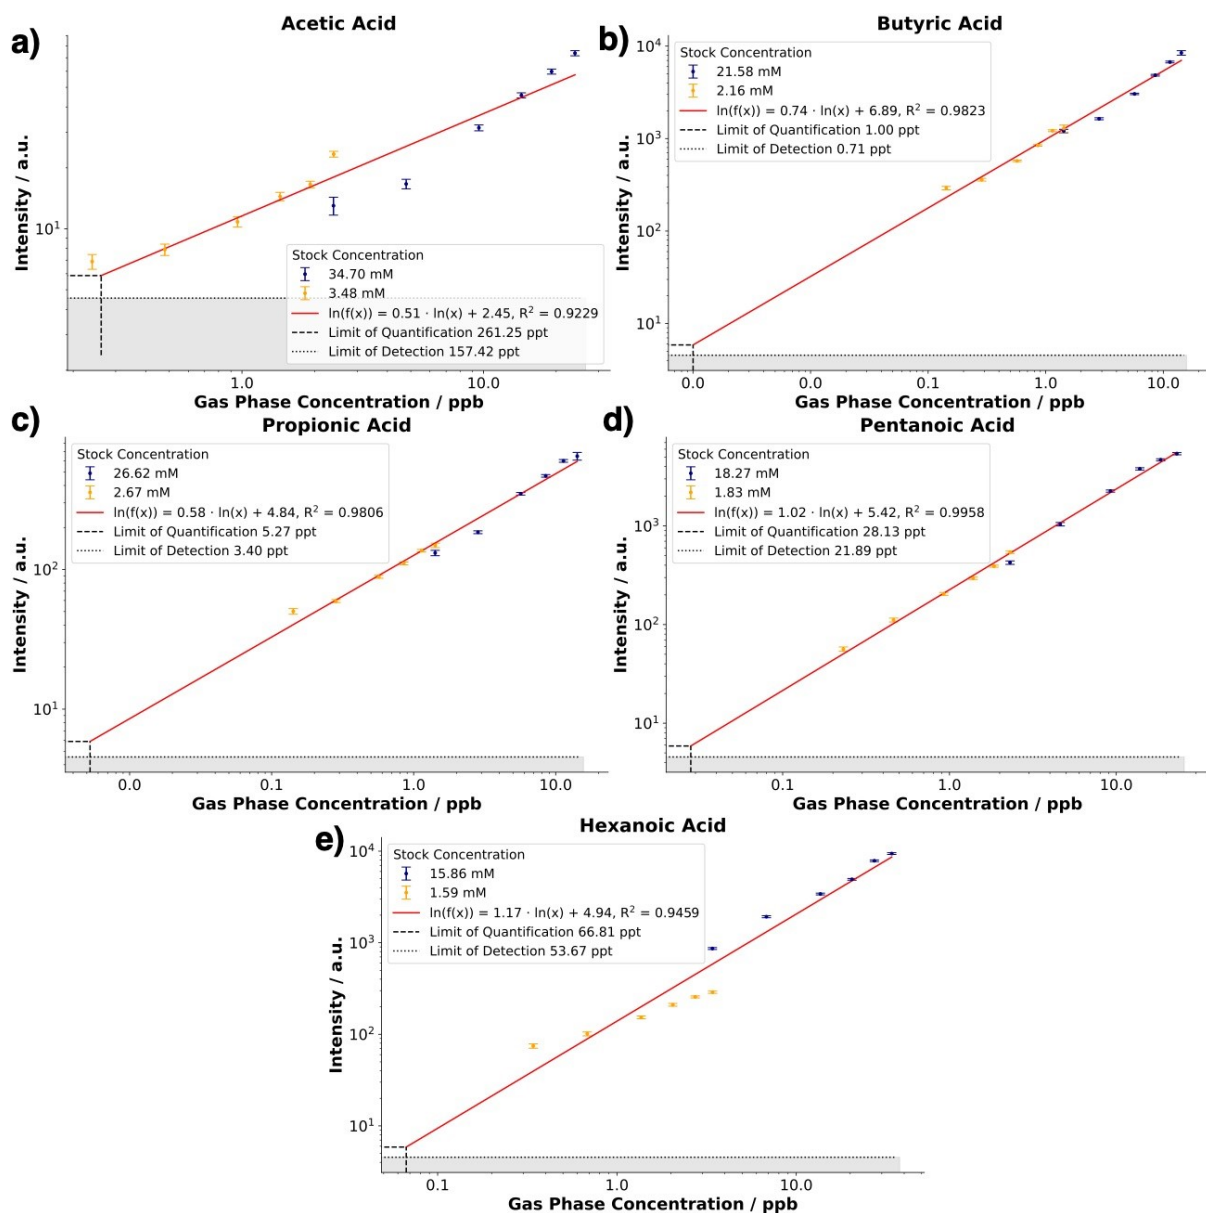

**Figure S5.** Calibration curves for the 95 % RH conditions with the limits of detection and quantification for each SCFA tested.
